# Supplementary material
Source: publisher figshare collection journal article supplement (https://gsapubs.figshare.com/articles/dataset/_/12501404)
Supplement: Supplementary file 1 [file 1]

## SUPPLEMENTAL DATA

TABLE SD1

| <b>Mobile device</b>    | <b>Functionality and use</b>                                                                                                 |
|-------------------------|------------------------------------------------------------------------------------------------------------------------------|
| Two-way Radio           | Audio communication between separate locations (requires line-of-sight)                                                      |
| GoPro Camera            | Taking videos of outcrops, landscapes, and participants (asynchronous)                                                       |
| iPad                    | Mobile device used for taking photos, video streaming and recording data                                                     |
| <b>iPad Application</b> | <b>Functionality and use</b>                                                                                                 |
| Camera                  | Taking photos and videos of outcrops, landscapes, and participants                                                           |
| DropBox                 | File syncing application for sharing files (requires internet)                                                               |
| StratLogger             | Collation of geo-located sediment and stratigraphic data into a stratigraphic column                                         |
| Strat Mobile            | Collation of geo-located sediment and stratigraphic data into a stratigraphic column                                         |
| FieldMove               | Mapping application for taking orientation measurements and creating geologic maps                                           |
| Flyover Country         | Application for preloading geologic maps and information to take into the field (works offline once information is uploaded) |
| EverNote                | Note taking application used for field notes and report writing                                                              |
| Notability              | Note taking application used for field notes and report writing                                                              |
| Skitch                  | Photo annotation application used for field sketches                                                                         |
| LiveStream              | Video broadcasting between separate locations (requires internet)                                                            |
| AirBeam                 | Video streaming application used for viewing remote locations (requires a network)                                           |
| PhotoSync               | Photo sharing application (requires a network)                                                                               |

Table SD1. Mobile devices and iPad applications (apps) used to promote accessibility and inclusive collaboration in the field. Note that many of these apps are available for other hardware and software platforms.
