# Supplementary material
Source: publisher figshare collection journal article supplement (https://gsapubs.figshare.com/articles/dataset/_/12501404)
Supplement: Supplementary file 2 [file 1]

FIGURE SD1

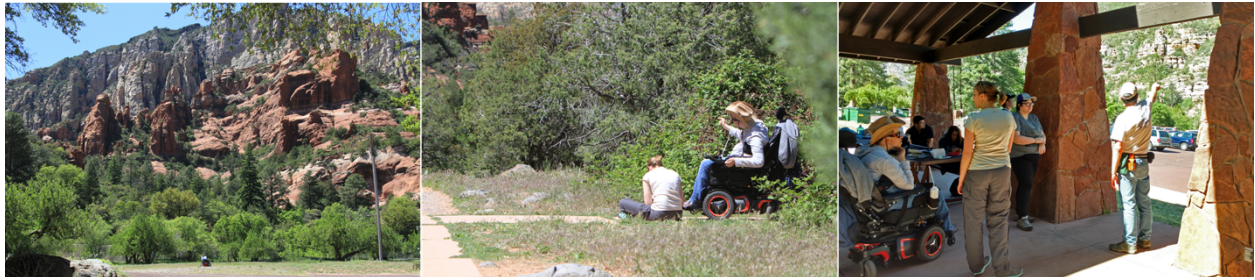

Figure SD1. A cliff exposure of the stratigraphy of the Colorado Plateau at Slide Rock State Park (left), a pair of students discussing the stratigraphic relationships (middle) and a group discussion that evaluated and summarized the field observation of the paired groups (right).

FIGURE SD2

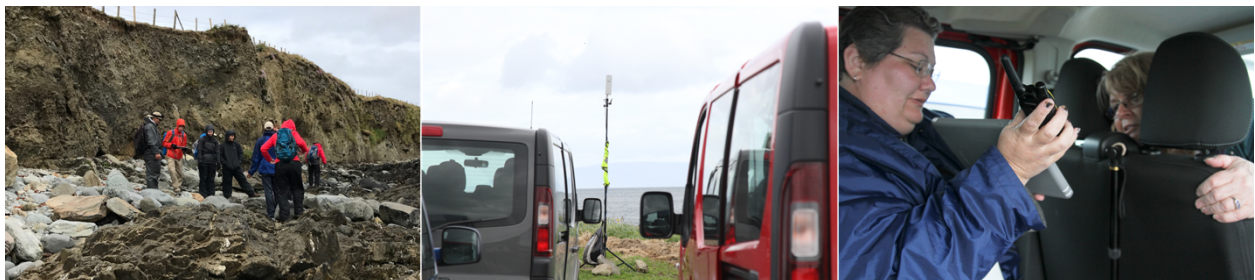

Figure SD2. Students at the exposed seaside cliffs near Kilkee (left) using the camera and Skitch application on the iPads (middle) to record and annotate the sedimentary structures and deformation features (right) to share with their peers who did not access this location.

FIGURE SD3

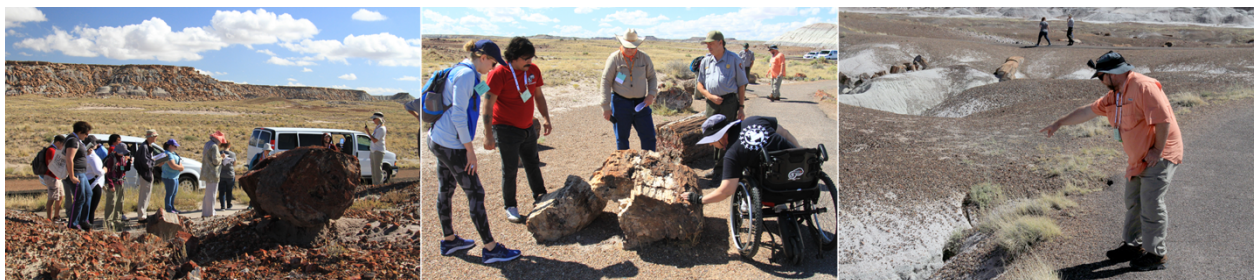

Figure SD3. Examples of stops during the 2019 GSA accessible field trip through the Petrified Forest National Park (PEFO) illustrating the use of locations with accessible variability and the use of GoPro cameras (right) to capture and share photos and videos of the field locations and outcrops.
